# Supplementary material
Source: PubMed Central journal article supplement (PMC2852259)
Supplement: NIHMS188445-supplement-Supp_Fig_2.pdf [file NIHMS188445-supplement-Supp_Fig_2.pdf]

|                   | 1   | 10                                                              | 20 | 30              |
|-------------------|-----|-----------------------------------------------------------------|----|-----------------|
| Amel eyg          | - R | Q R L L E L S H G L G A L R H Y N D L A N H V L S L N Q         |    |                 |
| Nvit eyg          | - - | Q R M L E L S H G L G A L R H Y N D L A N H V L S L N Q         |    |                 |
| Tcas eyg          | -   | Q Q R F L E L S R - - F G L R R H Y - D L A Q H M L T Q Q G     |    |                 |
| Dmel toe          | -   | Q H R L L E L S R - - F G L R R G Y - D L A Q H M L S Q Q G     |    |                 |
| Dmel eyg          | -   | Q H R L L E F G G - - - - L R R G Y - D I A Q H M L T Q Q G     |    |                 |
| Amel prd          | G   | Q Q G R V N Q L G G G V F I N G R P L P N H I R R L K I V E M A |    |                 |
| Nvit prd          | G   | Q Q G R V N Q L G G G V F I N G R P L P N H I R R L K I V E M A |    |                 |
| Tcas prd          | G   | Q Q G R V N Q L G G G V F I N G R P L P N H I R R L K I V E M A |    |                 |
| Dmel Prd          | G   | Q Q G R V N Q L G G G V F I N G R P L P N N I R R L K I V E M A |    |                 |
| Dmel gsb-n        | G   | Q Q G R V N Q L G G G V F I N G R P L P N H I R R L K I V E M A |    |                 |
| Tcas gsb-n        | G   | Q Q G R V N Q L G G G V F I N G R P L P N H I R R L K I V E M A |    |                 |
| Amel gsb-n (Pby1) | G   | Q G R M N Q L G G G V F I N G R P L P N H I R R L K I V E M A   |    |                 |
| Same gsb-n (Pby2) | -   | -                                                               | -  | -               |
| Same gsb (Pby1)   | -   | -                                                               | -  | -               |
| Tcas gsb          | G   | Q Q G R V N Q L G G G V F I N G R P L P N H I R R L K I V E M A |    |                 |
| Amel gsb (Pby2)   | G   | Q Q G R V N Q L G G G V F I N G R P L P N H I R R L K I V E M A |    |                 |
| Dmel gsb          | G   | Q Q G R V N Q L G G G V F I N G R P L P N H I R R R Q I V E M A |    |                 |
| Amel ey           | G   | H S G G V N Q L G G G V F V G G R P L P D S T R Q K I V E L A   |    |                 |
| Nvit ey           | G   | H S G G V N Q L G G G V F V G G R P L P D S T R Q K I V E L A   |    |                 |
| Tcas ey           | G   | H S G G V N Q L G G G V F V G G R P L P D S T R Q K I V E L A   |    |                 |
| Dmel ey           | C   | H S G G V N Q L G G G V F V G G R P L P D S T R Q K I V E L A   |    |                 |
| Dmel toy          | G   | H S G G I N Q L G G G V Y V N G R P L P D S T R Q K I V E L A   |    |                 |
| Tcas toy          | G   | H S G G I N Q L G G G V Y V N G R P L P D S T R Q K I V E L A   |    |                 |
| Amel toy          | G   | H S G G V N Q L G G G V Y V N G R P L P D S T R Q K I V E L A   |    |                 |
| Nvit toy          | G   | H S G G V N Q L G G G V Y V N G R P L P D S T R Q K I V E L A   |    |                 |
| Dmel sv           | G   | H G G G V N Q L G G G V F V N G R P L P D V V R Q R I V E L A   |    |                 |
| Tcas sv           | G   | H G G G V N Q L G G G V F V N G R P L P D V V R Q R I V E L A   |    |                 |
| Amel sv           | R   | H G G G V N Q L G G G V F V N G R P L P D V V R Q R I V E L A   |    |                 |
| Nvit sv           | -   | -                                                               | -  | - M S S A R C D |
| Dmel pox-n        | G   | Q A G V N Q L G G G V F V N G R P L P D C V R R R I V D L A     |    |                 |
| Tcas pox-n        | R   | Q A G V N Q L G G G V F V N G R P L P D C V R R R I V E L A     |    |                 |
| Amel pox-n        | G   | Q A G V N Q L G G G V F V N G R P L P D C V R Q R I V Q L A     |    |                 |
| Nvit pox-n        | G   | Q A G V N Q L G G G V F V N G R P L P D C V R Q K I V Q L A     |    |                 |
| Dmel pox-m        | Q   | Y G E V N Q L G G G V F V N G R P L P N A T R M R I V E L A     |    |                 |
| Tcas pox-m        | Q   | Y G E V N Q L G G G V F V N G R P L P N S V R L R I V E L S     |    |                 |
| Amel pox-m        | Q   | Y G E V N Q L G G G V F V N G R P L P N A V R L R I V E L A     |    |                 |
| Nvit pox-m        | Q   | Y G E V N Q L G G G V F V N G R P L P N A V R L R I V E L A     |    |                 |



|                   | 61 |   |   |   | 70 |   |   |   | 80 |   |   |   | 90 |   |   |   |   |   |   |   |   |   |   |   |   |   |   |   |   |   |   |
|-------------------|----|---|---|---|----|---|---|---|----|---|---|---|----|---|---|---|---|---|---|---|---|---|---|---|---|---|---|---|---|---|---|
| Amel eyg          | -  | - | - | - | P  | G | L | I | G  | G | S | K | -  | P | K | V | A | T | P | A | V | V | A | K | I | E | Q | Y | K | R |   |
| Nvit eyg          | -  | - | - | - | P  | G | L | I | G  | G | S | K | -  | P | K | V | A | T | P | A | V | V | S | K | I | E | Q | Y | K | R |   |
| Tcas eyg          | -  | - | - | - | P  | G | L | I | G  | G | S | K | -  | P | K | V | A | T | P | A | V | V | S | K | I | E | Q | Y | K | R |   |
| Dmel toe          | -  | - | - | - | P  | G | L | I | G  | G | S | K | -  | P | K | V | A | T | P | T | V | V | S | K | I | E | Q | Y | K | R |   |
| Dmel eyg          | -  | - | - | - | P  | G | L | I | G  | G | S | K | -  | P | K | V | A | T | P | T | V | V | S | K | I | E | Q | Y | K | R |   |
| Amel prd          | G  | S | I | R | P  | G | V | I | G  | G | S | K | -  | P | R | V | A | T | P | E | V | E | A | R | I | E | E | Y | K | R |   |
| Nvit prd          | G  | S | I | R | P  | G | V | I | G  | G | S | K | -  | P | R | V | A | T | P | E | V | E | S | K | I | E | S | Y | K | R |   |
| Tcas prd          | G  | S | I | R | P  | G | V | I | G  | G | S | K | -  | P | R | V | A | T | P | E | V | E | N | R | I | E | Q | Y | K | R |   |
| Dmel Prd          | G  | S | I | R | P  | G | V | I | G  | G | S | K | -  | P | R | I | A | T | P | E | I | E | N | R | I | E | E | Y | K | R |   |
| Dmel gsb-n        | G  | S | I | R | P  | G | V | I | G  | G | S | K | -  | P | K | V | T | S | P | E | I | E | T | R | I | E | D | L | R | K |   |
| Tcas gsb-n        | G  | S | I | R | P  | G | V | I | G  | G | S | K | -  | P | R | V | A | T | P | E | I | E | T | R | I | E | Q | M | K | K |   |
| Amel gsb-n (Pby1) | G  | S | I | R | P  | G | V | I | G  | G | S | K | -  | P | R | V | A | T | P | E | I | E | A | R | I | E | E | M | K | R |   |
| Same gsb-n (Pby2) | G  | S | I | R | P  | G | V | I | G  | G | S | K | -  | P | R | V | A | T | P | E | I | E | A | R | I | E | E | Y | K | K |   |
| Same gsb (Pby1)   | G  | S | I | R | P  | G | V | I | G  | G | S | K | -  | P | R | V | A | T | P | E | V | E | A | R | I | E | D | D | Y | K | K |
| Tcas gsb          | G  | S | I | R | P  | G | V | I | G  | G | S | K | -  | P | R | V | A | T | L | E | V | E | A | R | I | E | Q | L | K | K |   |
| Amel gsb (Pby2)   | G  | S | I | R | P  | G | V | I | G  | G | S | K | -  | P | R | V | A | T | P | E | V | E | A | R | I | E | D | M | K | R |   |
| Dmel gsb          | G  | S | I | R | P  | G | V | I | G  | G | S | K | -  | P | R | V | A | T | P | D | I | E | S | R | I | E | E | L | K | Q |   |
| Amel ey           | G  | S | I | R | P  | R | A | I | G  | G | S | K | -  | P | R | V | A | T | A | E | V | V | S | K | I | S | L | Y | K | S |   |
| Nvit ey           | G  | S | I | R | P  | R | A | I | G  | G | S | K | -  | P | R | V | A | T | A | E | V | V | S | K | I | S | L | Y | K | S |   |
| Tcas ey           | G  | S | I | R | P  | R | A | I | G  | G | S | K | -  | P | R | V | A | T | A | E | V | V | S | K | I | S | S | Y | K | R |   |
| Dmel ey           | G  | S | I | R | P  | R | A | I | G  | G | S | K | -  | P | R | V | A | T | A | E | V | V | S | K | I | S | Q | Y | K | R |   |
| Dmel toy          | G  | S | I | K | P  | R | A | I | G  | G | S | K | -  | P | R | V | A | T | T | P | V | V | Q | K | I | A | D | Y | K | R |   |
| Tcas toy          | G  | S | I | K | P  | R | A | I | G  | G | S | K | -  | P | R | V | A | T | Q | P | V | V | N | K | I | A | E | F | K | R |   |
| Amel toy          | G  | S | I | K | P  | R | A | I | G  | G | S | K | -  | P | R | V | A | T | T | P | V | V | N | K | I | A | D | Y | K | R |   |
| Nvit toy          | G  | S | I | K | P  | R | A | I | G  | G | S | K | -  | P | R | V | A | T | T | P | V | V | N | K | I | A | D | Y | K | R |   |
| Dmel sv           | G  | S | F | K | A  | G | V | I | G  | G | S | K | -  | P | K | V | A | T | P | P | V | V | D | A | I | A | A | N | Y | K | R |
| Tcas sv           | G  | S | F | K | A  | G | V | I | G  | G | S | K | -  | P | K | V | A | T | P | P | V | V | D | A | I | A | A | N | Y | K | R |
| Amel sv           | G  | S | F | K | A  | G | V | I | G  | G | S | K | -  | P | K | V | A | T | P | P | V | V | E | A | I | A | A | N | Y | K | R |
| Nvit sv           | G  | S | F | K | A  | G | V | I | G  | G | S | K | -  | P | K | V | A | T | P | P | V | V | D | A | I | A | A | N | Y | K | R |
| Dmel pox-n        | G  | S | I | R | P  | G | S | I | G  | G | S | K | T  | K | Q | V | A | T | P | T | V | V | K | K | I | I | R | L | K | E |   |
| Tcas pox-n        | G  | S | I | R | P  | G | S | I | G  | G | S | K | T  | K | Q | V | A | T | P | T | V | V | K | K | I | L | R | F | K | Q |   |
| Amel pox-n        | G  | S | I | R | P  | G | S | I | G  | G | S | K | T  | K | Q | V | A | T | P | T | V | V | K | K | I | L | R | M | K | Q |   |
| Nvit pox-n        | G  | S | I | R | P  | G | S | I | G  | G | S | K | T  | K | Q | V | A | T | P | S | I | V | K | K | I | L | R | M | K | Q |   |
| Dmel pox-m        | G  | S | I | L | P  | G | A | I | G  | G | S | K | -  | P | R | V | T | T | P | K | V | V | N | Y | I | R | E | L | K | Q |   |
| Tcas pox-m        | G  | S | I | L | P  | G | A | I | G  | G | S | K | -  | P | R | V | T | T | P | K | V | V | A | Y | I | K | D | L | K | Q |   |
| Amel pox-m        | G  | S | I | L | P  | G | A | I | G  | G | S | K | -  | P | R | V | T | T | P | K | V | V | Q | Y | I | K | Q | L | K | L |   |
| Nvit pox-m        | G  | S | I | L | P  | G | A | I | G  | G | S | K | -  | P | R | V | T | T | P | K | V | V | Q | Y | I | K | Q | L | K | H |   |

|                   | 91 | 100 | 110 | 120 |   |   |   |   |   |   |   |   |   |   |   |   |   |   |   |   |   |   |   |   |   |   |   |   |   |   |
|-------------------|----|-----|-----|-----|---|---|---|---|---|---|---|---|---|---|---|---|---|---|---|---|---|---|---|---|---|---|---|---|---|---|
| Amel eyg          | E  | N   | P   | T   | I | F | A | W | E | I | R | E | R | L | I | S | E | G | V | C | S | N | A | T | A | P | S | V | S | S |
| Nvit eyg          | E  | N   | P   | T   | I | F | A | W | E | I | R | E | R | L | I | S | E | G | V | C | S | N | A | T | A | P | S | V | S | S |
| Tcas eyg          | E  | N   | P   | T   | I | F | A | W | E | I | R | E | R | L | I | S | E | G | V | C | T | N | A | T | A | P | S | V | S | S |
| Dmel toe          | E  | N   | P   | T   | I | F | A | W | E | I | R | E | R | L | I | T | E | G | V | C | T | N | A | T | A | P | S | V | S | S |
| Dmel eyg          | E  | N   | P   | T   | I | F | A | W | E | I | R | E | R | L | I | S | E | G | V | C | T | N | A | T | A | P | S | V | S | S |
| Amel prd          | D  | N   | P   | G   | I | F | S | W | E | I | R | D | R | L | I | K | E | G | I | C | D | R | T | S | A | P | S | V | S | A |
| Nvit prd          | D  | N   | P   | S   | I | F | S | W | E | V | R | D | R | L | I | K | E | G | I | C | D | R | T | T | A | P | S | V | S | A |
| Tcas prd          | E  | N   | P   | S   | I | F | S | W | E | I | R | D | R | L | V | K | E | G | I | C | D | R | S | T | A | P | S | V | S | A |
| Dmel Prd          | S  | S   | P   | G   | M | F | S | W | E | I | R | E | K | L | I | R | E | G | V | C | D | R | S | T | A | P | S | V | S | A |
| Dmel gsb-n        | E  | N   | P   | S   | I | F | S | W | E | I | R | E | K | L | I | K | E | G | F | A | D | P | - | - | - | P | S | T | S | S |
| Tcas gsb-n        | E  | N   | P   | T   | I | F | S | W | E | I | R | E | R | L | I | K | E | G | V | T | D | P | - | - | - | P | S | V | S | S |
| Amel gsb-n (Pby1) | D  | N   | P   | G   | I | F | S | W | E | I | R | E | K | L | V | K | E | G | F | T | D | P | - | - | - | P | S | V | S | S |
| Same gsb-n (Pby2) | A  | N   | P   | G   | I | F | S | W | E | I | R | D | R | L | I | K | E | G | V | C | D | A | N | T | A | P | S | A | S | A |
| Same gsb (Pby1)   | A  | N   | P   | G   | I | F | S | W | E | I | R | D | R | L | I | K | D | G | V | C | D | K | N | S | V | P | S | V | S | S |
| Tcas gsb          | E  | E   | P   | Q   | I | F | S | W | E | I | R | D | R | L | I | K | E | G | I | C | D | K | N | S | A | P | S | V | S | S |
| Amel gsb (Pby2)   | Q  | N   | P   | G   | I | F | S | W | E | I | R | E | K | L | I | K | D | G | I | C | D | K | A | S | A | P | S | V | S | S |
| Dmel gsb          | S  | Q   | P   | G   | I | F | S | W | E | I | R | A | K | L | I | E | A | G | V | C | D | K | Q | N | A | P | S | V | S | S |
| Amel ey           | E  | C   | P   | S   | I | F | A | W | E | I | R | D | R | L | L | Q | E | G | V | C | T | N | D | N | I | P | S | V | S | S |
| Nvit ey           | E  | C   | P   | S   | I | F | A | W | E | I | R | D | R | L | L | Q | E | G | V | C | T | N | D | N | I | P | S | V | S | S |
| Tcas ey           | E  | C   | P   | S   | I | F | A | W | E | I | R | D | R | L | L | Q | E | G | V | C | T | N | D | N | I | P | S | V | S | S |
| Dmel ey           | E  | C   | P   | S   | I | F | A | W | E | I | R | D | R | L | L | Q | E | N | V | C | T | N | D | N | I | P | S | V | S | S |
| Dmel toy          | E  | C   | P   | S   | I | F | A | W | E | I | R | D | R | L | L | S | E | Q | V | C | N | S | D | N | I | P | S | V | S | S |
| Tcas toy          | E  | C   | P   | S   | I | F | A | W | E | I | R | D | R | L | L | S | E | G | V | C | N | N | D | N | I | P | S | V | S | S |
| Amel toy          | E  | C   | P   | S   | I | F | A | W | E | I | R | D | R | L | L | Q | E | G | V | C | N | N | D | N | I | P | S | V | S | S |
| Nvit toy          | E  | C   | P   | S   | I | F | A | W | E | I | R | D | R | L | L | Q | E | G | V | C | N | N | D | N | I | P | S | V | S | S |
| Dmel sv           | E  | N   | P   | T   | M | F | A | W | E | I | R | D | R | L | L | A | E | A | I | C | S | Q | D | N | V | P | S | V | S | S |
| Tcas sv           | E  | N   | P   | T   | M | F | A | W | E | I | R | D | R | L | L | A | E | G | I | C | S | Q | D | N | V | P | S | V | S | S |
| Amel sv           | D  | N   | P   | T   | M | F | A | W | E | I | R | D | R | L | L | A | E | G | I | C | S | Q | D | N | V | P | S | V | S | S |
| Nvit sv           | D  | N   | P   | T   | M | F | A | W | E | I | R | D | R | L | L | A | E | G | I | C | S | Q | D | N | V | P | S | V | S | S |
| Dmel pox-n        | E  | N   | S   | G   | M | F | A | W | E | I | R | E | Q | L | Q | Q | R | V | C | D | P | S | S | V | P | S | I | S | S |   |
| Tcas pox-n        | E  | N   | P   | G   | M | F | A | W | E | I | R | E | Q | L | I | A | Q | R | V | C | E | P | H | N | I | P | S | V | S | S |
| Amel pox-n        | E  | Q   | P   | T   | M | F | A | W | E | I | R | E | Q | L | A | R | Q | G | A | C | D | P | Q | S | L | P | S | V | S | S |
| Nvit pox-n        | E  | N   | P   | T   | I | F | A | W | E | I | R | E | Q | L | A | R | E | G | - | C | D | P | Q | N | L | P | S | V | S | S |
| Dmel pox-m        | R  | D   | P   | G   | I | F | A | W | E | I | R | D | R | L | L | S | E | G | I | C | D | K | T | N | V | P | S | V | S | S |
| Tcas pox-m        | K  | D   | P   | G   | I | F | A | W | E | I | R | D | R | L | L | S | D | G | I | C | D | K | Y | N | V | P | S | V | S | S |
| Amel pox-m        | K  | D   | P   | G   | I | F | A | W | E | I | R | D | R | L | L | S | D | G | V | C | D | K | Y | N | V | P | S | V | S | S |
| Nvit pox-m        | K  | D   | P   | G   | I | F | A | W | E | I | R | D | R | L | L | S | D | G | V | C | D | K | Y | N | V | P | S | V | S | S |















|                   | 331 | 340                                                         | 350 | 360                                                         |
|-------------------|-----|-------------------------------------------------------------|-----|-------------------------------------------------------------|
| Amel eyg          | -   | A G A P D H S L H A                                         | -   | - D A I A R G Y L Q - D                                     |
| Nvit eyg          | -   | A A S P E H A L H A V                                       | -   | - D A I A R G Y L H Q E                                     |
| Tcas eyg          | -   | S P H P D H G L L N S                                       | -   | - P P G T H - - - - P                                       |
| Dmel toe          | -   | L P A L S P D S G S R D S R S P D A D A N R M I D           |     |                                                             |
| Dmel eyg          | -   | R A I S P G S G S H D T L E S A D E                         |     | - - - - - N                                                 |
| Amel prd          | -   | -                                                           | -   | - K T N E S K T S S G - - - - -                             |
| Nvit prd          | -   | -                                                           | -   | - - - - - G K A S S G - - - - -                             |
| Tcas prd          | -   | -                                                           | -   | - V L W K D K S T D N E - - - - - G                         |
| Dmel Prd          | -   | -                                                           | -   | - D V S G G H H N N G K P S D E D                           |
| Dmel gsb-n        | -   | -                                                           | -   | - - - - - - - - - - - - - - - - - D                         |
| Tcas gsb-n        | -   | -                                                           | -   | - - - - - - - - - - - - - - - - - E                         |
| Amel gsb-n (Pby1) | -   | -                                                           | -   | - - - - - - - - - - - - - - - - - D                         |
| Same gsb-n (Pby2) | -   | -                                                           | -   | - - - - - - - - - - - - - - - - - -                         |
| Same gsb (Pby1)   | -   | -                                                           | -   | - - - - - - - - - - - - - - - - - D                         |
| Tcas gsb          | -   | -                                                           | -   | - - - - - - - - - - - - - - - - - D                         |
| Amel gsb (Pby2)   | -   | -                                                           | -   | - - - - - - - - - - - - - - - - - D                         |
| Dmel gsb          | -   | -                                                           | -   | - - - - - - - - - - - - - - - - - D                         |
| Amel ey           | -   | T L V E G N P K E V Q S Q R V E G G G D N S N A G           | -   | - S V S                                                     |
| Nvit ey           | -   | V L V A E L E G G A H S D E T N S G G D N S N A G           | -   | - S V S                                                     |
| Tcas ey           | -   | K K V T D L D G - I N S D E T N S G - D N S N A G           | -   | - S S I                                                     |
| Dmel ey           | I   | H L K K E L D G H Q S D E T G S G E G E N S N G G A S       | -   | - N I                                                       |
| Dmel toy          | V   | Q K R E L Q F S V E V S H T N S H D S T S D G N S E H N S   |     |                                                             |
| Tcas toy          | L   | Q K R - - - - - - - - - - A D A M H E N T S D G N S E H N S |     |                                                             |
| Amel toy          | G   | G E R - - - - - - - - - - - - - - - - - H N S               |     |                                                             |
| Nvit toy          | E   | R E R E S G A A V D A S S L R A R E T T S D G N S E H N S   |     |                                                             |
| Dmel sv           | -   | -                                                           | -   | - T D S V Q V S V G H I N A N S N E T T H I N               |
| Tcas sv           | -   | -                                                           | -   | - - - - - - - - - - - - - - - - - -                         |
| Amel sv           | -   | -                                                           | -   | - - - - - - - - - - - - - - - - - -                         |
| Nvit sv           | -   | -                                                           | -   | - - - - - - - - - - - - - - - - - Q Q Q G P V S V I A H A P |
| Dmel pox-n        | -   | -                                                           | -   | - N P N V S G L D L S Y S A L H K H W L W N P               |
| Tcas pox-n        | -   | -                                                           | -   | - L P Y F S M H D S T Y P S N R - - - - -                   |
| Amel pox-n        | -   | -                                                           | -   | - L Y Q A T T L H L H H G M Q S F T S L D V E               |
| Nvit pox-n        | -   | -                                                           | -   | - L Y Q A T S L R I Q N G A Q - - - L A D S E               |
| Dmel pox-m        | -   | -                                                           | -   | - G G G P H H P H H H H H H Q S A A A A A S A               |
| Tcas pox-m        | -   | -                                                           | -   | - - - - - - - - - - - - - - - - - -                         |
| Amel pox-m        | -   | -                                                           | -   | - - - - - - - - - - - P H H P A H H H H H H H L Y A A A A A |
| Nvit pox-m        | -   | -                                                           | -   | - - - - - - - - - - - - - - - - - -                         |







|                   | 451 | 460 | 470 | 480 |
|-------------------|-----|-----|-----|-----|
| Amel eyg          | -   | -   | -   | -   |
| Nvit eyg          | -   | -   | -   | -   |
| Tcas eyg          | -   | -   | -   | -   |
| Dmel toe          | -   | -   | -   | -   |
| Dmel eyg          | -   | -   | -   | -   |
| Amel prd          | -   | -   | -   | -   |
| Nvit prd          | -   | -   | -   | -   |
| Tcas prd          | -   | -   | -   | -   |
| Dmel Prd          | -   | -   | -   | -   |
| Dmel gsb-n        | -   | -   | -   | -   |
| Tcas gsb-n        | -   | -   | -   | -   |
| Amel gsb-n (Pby1) | -   | -   | -   | -   |
| Same gsb-n (Pby2) | -   | -   | -   | -   |
| Same gsb (Pby1)   | -   | -   | -   | -   |
| Tcas gsb          | -   | -   | -   | -   |
| Amel gsb (Pby2)   | -   | -   | -   | -   |
| Dmel gsb          | -   | -   | -   | -   |
| Amel ey           | -   | -   | -   | -   |
| Nvit ey           | -   | -   | -   | -   |
| Tcas ey           | -   | -   | -   | -   |
| Dmel ey           | -   | -   | -   | -   |
| Dmel toy          | -   | -   | -   | -   |
| Tcas toy          | -   | -   | -   | -   |
| Amel toy          | -   | -   | -   | -   |
| Nvit toy          | -   | -   | -   | -   |
| Dmel sv           | -   | -   | -   | -   |
| Tcas sv           | -   | -   | -   | -   |
| Amel sv           | -   | -   | -   | -   |
| Nvit sv           | -   | -   | -   | -   |
| Dmel pox-n        | P   | A   | A   | L   |
| Tcas pox-n        | S   | L   | T   | A   |
| Amel pox-n        | S   | G   | G   | G   |
| Nvit pox-n        | N   | G   | A   | G   |
| Dmel pox-m        | S   | A   | -   | -   |
| Tcas pox-m        | G   | S   | S   | I   |
| Amel pox-m        | N   | L   | E   | N   |
| Nvit pox-m        | R   | Q   | S   | S   |
| Dmel pox-n        | P   | L   | A   | T   |
| Tcas pox-n        | S   | D   | K   | Q   |
| Amel pox-n        | K   | I   | M   | S   |
| Nvit pox-n        | P   | R   | I   | L   |
| Dmel pox-m        | K   | T   | -   | -   |
| Tcas pox-m        | -   | -   | -   | -   |
| Amel pox-m        | -   | -   | -   | -   |
| Nvit pox-m        | -   | -   | -   | -   |

|                   | 481 | 490 | 500 | 510 |   |   |   |   |   |   |   |   |   |   |   |   |   |   |   |   |   |   |   |   |   |   |   |   |   |   |
|-------------------|-----|-----|-----|-----|---|---|---|---|---|---|---|---|---|---|---|---|---|---|---|---|---|---|---|---|---|---|---|---|---|---|
| Amel eyg          | -   | L   | S   | E   | A | R | V | Q | V | W | F | S | N | R | R | A | K | W | R | R | H |   |   |   |   |   |   |   |   |   |
| Nvit eyg          | -   | L   | S   | E   | A | R | V | Q | V | W | F | S | N | R | R | A | K | W | R | R | H |   |   |   |   |   |   |   |   |   |
| Tcas eyg          | -   | L   | S   | E   | A | R | V | Q | V | W | F | S | N | R | R | A | K | W | R | R | H |   |   |   |   |   |   |   |   |   |
| Dmel toe          | -   | L   | S   | E   | A | R | V | Q | V | W | F | S | N | R | R | A | K | W | R | R | H |   |   |   |   |   |   |   |   |   |
| Dmel eyg          | -   | L   | S   | E   | A | R | V | Q | V | W | F | S | N | R | R | A | K | W | R | R | H |   |   |   |   |   |   |   |   |   |
| Amel prd          | -   | L   | T   | E   | A | R | I | Q | V | W | F | S | N | R | R | A | R | L | R | K | Q |   |   |   |   |   |   |   |   |   |
| Nvit prd          | -   | L   | T   | E   | A | R | I | Q | V | W | F | S | N | R | R | A | R | L | R | K | Q |   |   |   |   |   |   |   |   |   |
| Tcas prd          | -   | L   | T   | E   | A | R | I | Q | V | W | F | S | N | R | R | A | R | L | R | K | Q |   |   |   |   |   |   |   |   |   |
| Dmel Prd          | -   | L   | T   | E   | A | R | I | Q | V | W | F | S | N | R | R | A | R | L | R | K | Q |   |   |   |   |   |   |   |   |   |
| Dmel gsb-n        | -   | L   | T   | E   | A | R | I | Q | V | W | F | S | N | R | R | A | R | L | R | K | H |   |   |   |   |   |   |   |   |   |
| Tcas gsb-n        | -   | L   | T   | E   | A | R | I | Q | V | W | F | S | N | R | R | A | R | L | R | K | H |   |   |   |   |   |   |   |   |   |
| Amel gsb-n (Pby1) | -   | L   | T   | E   | A | R | I | Q | V | W | F | S | N | R | R | A | R | L | R | K | H |   |   |   |   |   |   |   |   |   |
| Same gsb-n (Pby2) | -   | L   | S   | E   | A | R | I | Q | V | W | F | S | N | R | R | A | R | W | R | K | H |   |   |   |   |   |   |   |   |   |
| Same gsb (Pby1)   | -   | L   | T   | E   | A | R | V | Q | V | W | F | S | N | R | R | A | R | L | R | K | Q |   |   |   |   |   |   |   |   |   |
| Tcas gsb          | -   | L   | T   | E   | A | R | V | Q | V | W | F | S | N | R | R | A | R | L | R | K | Q |   |   |   |   |   |   |   |   |   |
| Amel gsb (Pby2)   | -   | L   | T   | E   | A | R | V | Q | V | W | F | S | N | R | R | A | R | L | R | K | Q |   |   |   |   |   |   |   |   |   |
| Dmel gsb          | -   | L   | T   | E   | A | R | V | Q | V | W | F | S | N | R | R | A | R | L | R | K | Q |   |   |   |   |   |   |   |   |   |
| Amel ey           | -   | L   | P   | E   | A | R | I | Q | V | W | F | S | N | R | R | A | K | W | R | R | E |   |   |   |   |   |   |   |   |   |
| Nvit ey           | -   | L   | P   | E   | A | R | I | Q | V | W | F | S | N | R | R | A | K | W | R | R | E |   |   |   |   |   |   |   |   |   |
| Tcas ey           | -   | L   | P   | E   | A | R | I | Q | V | W | F | S | N | R | R | A | K | W | R | R | E |   |   |   |   |   |   |   |   |   |
| Dmel ey           | -   | L   | P   | E   | A | R | I | Q | V | W | F | S | N | R | R | A | K | W | R | R | E |   |   |   |   |   |   |   |   |   |
| Dmel toy          | -   | L   | P   | E   | A | R | I | Q | V | W | F | S | N | R | R | A | K | W | R | R | E |   |   |   |   |   |   |   |   |   |
| Tcas toy          | -   | L   | P   | E   | A | R | I | Q | V | W | F | S | N | R | R | A | K | W | R | R | E |   |   |   |   |   |   |   |   |   |
| Amel toy          | -   | L   | P   | E   | A | R | I | Q | V | W | F | S | N | R | R | A | K | W | R | R | E |   |   |   |   |   |   |   |   |   |
| Nvit toy          | -   | L   | P   | E   | A | R | I | Q | V | W | F | S | N | R | R | A | K | W | R | R | E |   |   |   |   |   |   |   |   |   |
| Dmel sv           | -   | -   | -   | -   | - | - | - | T | Y | S | G | D | Q | L | Y | T | N | - | - | - | - |   |   |   |   |   |   |   |   |   |
| Tcas sv           | -   | -   | -   | -   | - | - | - | Q | Y | N | G | D | Q | L | Y | S | N | - | - | - | - |   |   |   |   |   |   |   |   |   |
| Amel sv           | -   | -   | -   | -   | - | - | - | N | Y | N | G | D | Q | L | Y | S | N | - | - | - | - |   |   |   |   |   |   |   |   |   |
| Nvit sv           | -   | -   | -   | -   | - | - | - | T | Y | N | G | D | Q | L | Y | S | N | L | W | S | S | K | W | S | I | K |   |   |   |   |
| Dmel pox-n        | -   | -   | -   | -   | - | - | - | P | E | A | S | P | G | S | T | L | S | H | S | R | K | R | N | P | Y | S | I | E |   |   |
| Tcas pox-n        | -   | -   | -   | -   | - | - | - | - | - | - | - | - | - | - | - | - | - | - | - | - | - | - | - | - | - | - | - | - |   |   |
| Amel pox-n        | G   | N   | E   | Q   | N | T | M | A | K | E | M | A | I | E | E | R | P | T | Q | P | Q | R | K | R | N | P | Y | S | I | E |
| Nvit pox-n        | -   | -   | -   | -   | - | - | - | S | H | H | S | G | A | Q | Q | P | T | Q | P | - | R | K | R | N | P | Y | S | I | E |   |
| Dmel pox-m        | -   | -   | -   | -   | - | - | - | - | - | - | - | - | - | V | A | A | A | A | A | A | H | W | P | S | S | H | S | V | S |   |
| Tcas pox-m        | -   | -   | -   | -   | - | - | - | - | - | - | - | - | - | - | - | R | H | A | T | A | P | C | W | P | S | S | H | S | V | S |
| Amel pox-m        | -   | -   | -   | -   | - | - | - | - | - | - | - | - | - | Q | T | A | T | S | A | G | L | Q | W | P | S | P | H | T | V | H |
| Nvit pox-m        | -   | -   | -   | -   | - | - | - | - | - | - | - | - | - | T | S | S | T | T | T | S | L | Q | W | P | S | S | H | T | V | H |

511 519

|                   |   |   |   |   |   |   |   |   |   |   |
|-------------------|---|---|---|---|---|---|---|---|---|---|
| Amel eyg          | Q | - | - | - | - | - | - | - | - | - |
| Nvit eyg          | Q | - | - | - | - | - | - | - | - | - |
| Tcas eyg          | Q | - | - | - | - | - | - | - | - | - |
| Dmel toe          | Q | - | - | - | - | - | - | - | - | - |
| Dmel eyg          | Q | - | - | - | - | - | - | - | - | - |
| Amel prd          | L | - | - | - | - | - | - | - | - | - |
| Nvit prd          | S | - | - | - | - | - | - | - | - | - |
| Tcas prd          | I | - | - | - | - | - | - | - | - | - |
| Dmel Prd          | H | - | - | - | - | - | - | - | - | - |
| Dmel gsb-n        | - | - | - | - | - | - | - | - | - | - |
| Tcas gsb-n        | - | - | - | - | - | - | - | - | - | - |
| Amel gsb-n (Pby1) | - | - | - | - | - | - | - | - | - | - |
| Same gsb-n (Pby2) | C | - | - | - | - | - | - | - | - | - |
| Same gsb (Pby1)   | L | - | - | - | - | - | - | - | - | - |
| Tcas gsb          | - | - | - | - | - | - | - | - | - | - |
| Amel gsb (Pby2)   | L | - | - | - | - | - | - | - | - | - |
| Dmel gsb          | - | - | - | - | - | - | - | - | - | - |
| Amel ey           | E | - | - | - | - | - | - | - | - | - |
| Nvit ey           | E | - | - | - | - | - | - | - | - | - |
| Tcas ey           | E | - | - | - | - | - | - | - | - | - |
| Dmel ey           | E | - | - | - | - | - | - | - | - | - |
| Dmel toy          | E | - | - | - | - | - | - | - | - | - |
| Tcas toy          | E | - | - | - | - | - | - | - | - | - |
| Amel toy          | E | - | - | - | - | - | - | - | - | - |
| Nvit toy          | E | - | - | - | - | - | - | - | - | - |
| Dmel sv           | - | - | - | - | - | - | - | - | - | - |
| Tcas sv           | - | - | - | - | - | - | - | - | - | - |
| Amel sv           | - | - | - | - | - | - | - | - | - | - |
| Nvit sv           | D | E | H | K | L | L | S | E | L | - |
| Dmel pox-n        | E | L | L | K | K | P | E | K | - | - |
| Tcas pox-n        | E | L | L | K | K | P | D | K | - | - |
| Amel pox-n        | E | L | L | K | K | D | E | S | - | - |
| Nvit pox-n        | E | L | L | K | K | D | E | D | - | - |
| Dmel pox-m        | D | I | L | A | - | - | - | - | - | - |
| Tcas pox-m        | D | I | L | A | - | - | - | - | - | - |
| Amel pox-m        | D | I | L | A | - | - | - | - | - | - |
| Nvit pox-m        | D | I | L | S | - | - | - | - | - | - |
